# Supplementary material for: Evaluation of SUVlean consistency in FDG and PSMA PET/MR with Dixon-, James-, and Janma-based lean body mass correction
Source: PubMed Central journal article supplement (PMC7889776; doi:10.1186/s40658-021-00363-w), 2021-02-17
Supplement: 40658_2021_363_MOESM1_ESM.pdf [file 40658_2021_363_MOESM1_ESM.pdf]

**SUV\_bw****SUV\_dixon****SUV\_james****SUV\_janma****a**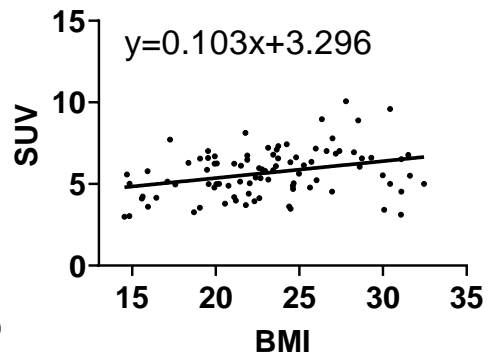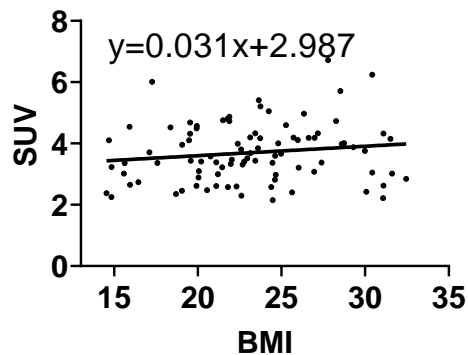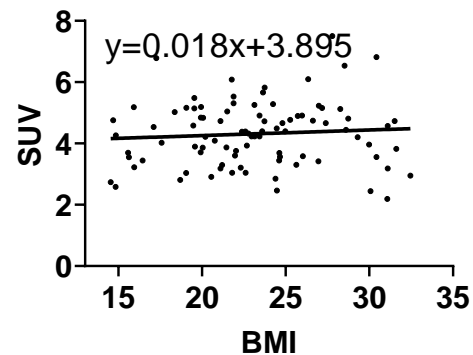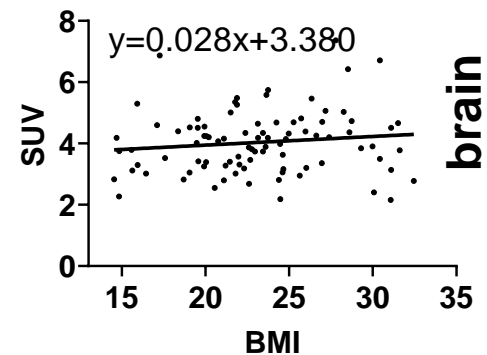**brain****b**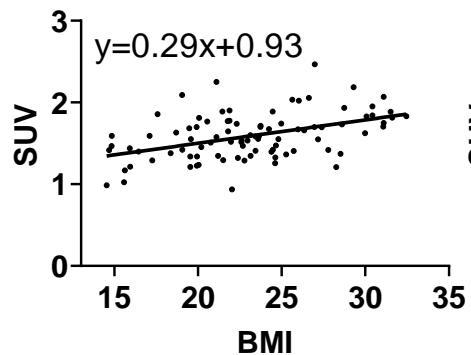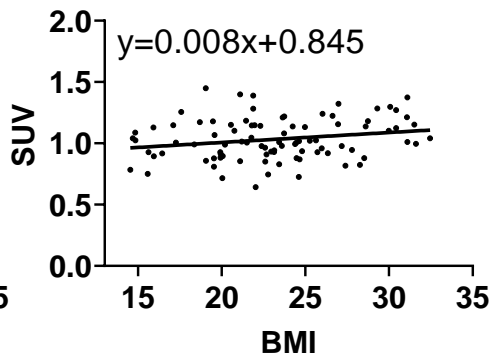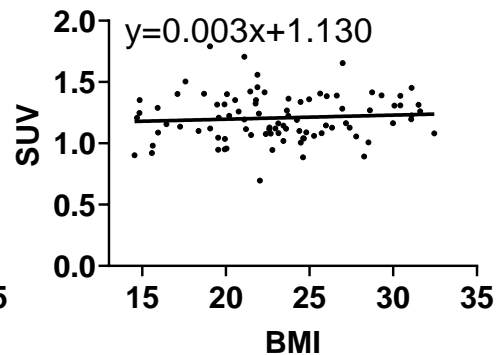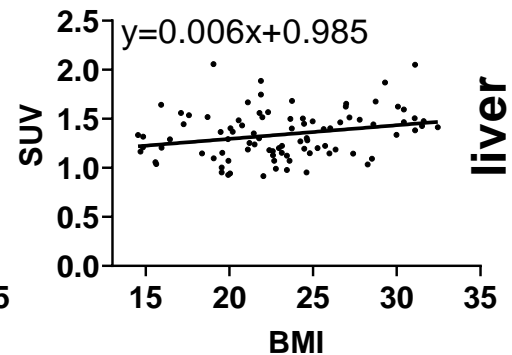**liver****c**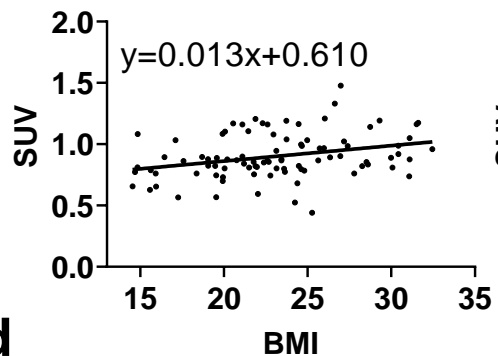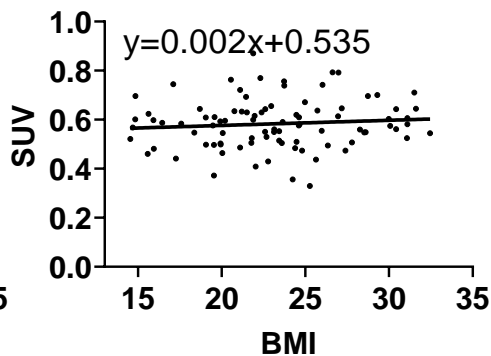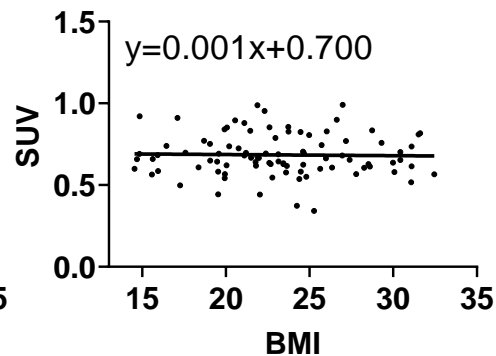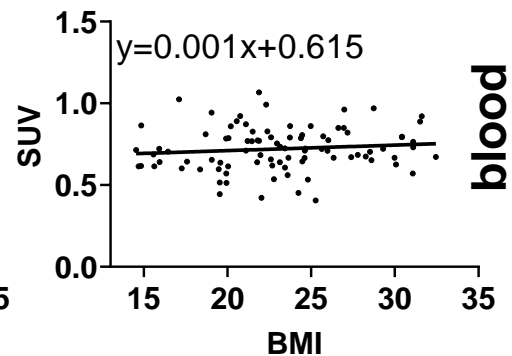**blood****d**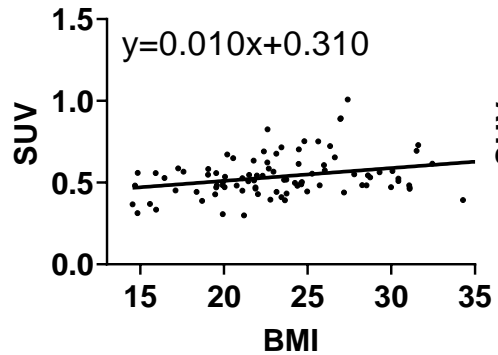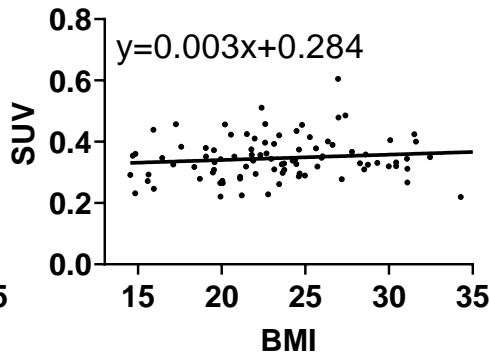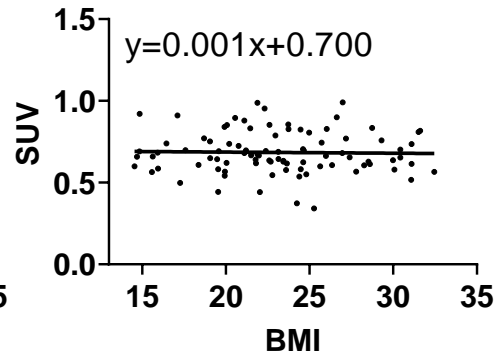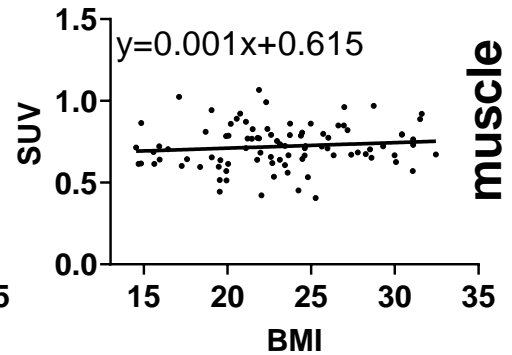**muscle**
